# Supplementary material for: 1,1-Diamino-2,2-dinitroethene (FOX-7) and 1-amino-1-hydrazino-2,2-dinitroethene (HFOX) as amphotères: bases with strong acids
Source: Royal Society of Chemistry journal article supplement (doi:10.1039/c4ta07098d), 2015-01-01
Supplement: c4ta07098d1.pdf [file c4ta07098d1.pdf]

Electronic Supplementary Information

1,1-Diamino-2,2-dinitroethene (FOX-7) and 1-amino-1-hydrazino-2,2-dinitroethene (HFOX) as amphotères: Bases with strong acids

Thao T. Vo,<sup>a</sup> and Jean'ne M. Shreeve<sup>\*a</sup>

<sup>a</sup>Department of Chemistry, University of Idaho, Moscow, Idaho 83833-2343 United States

E-mail: [jshreeve@uidaho.edu](mailto:jshreeve@uidaho.edu)

Table of Contents

(Compounds are numbered as in the paper)

|                                                                                                                                       |        |
|---------------------------------------------------------------------------------------------------------------------------------------|--------|
| 1. Single crystal X-ray Diffraction for <b>3a</b> , <b>3b</b> , <b>4a</b> , and <b>9</b>                                              | S2     |
| 2. Crystal data and structure refinement for <b>3a</b> , <b>3b</b> , <b>4a</b> , and <b>9</b>                                         | S3-S4  |
| 3. Selected bond-lengths (Å) and bond angles (°) determined by X-ray diffraction for <b>3a</b> , <b>3b</b> , <b>4a</b> , and <b>9</b> | S5-S10 |
| 4. References                                                                                                                         | S11    |

## 1. X-ray crystallography:

A colorless prism of dimensions 0.44 x 1.01 x 1.28 mm<sup>3</sup> (**3a**), a colorless prism of 0.37 x 0.14 x 0.11 mm<sup>3</sup> (**3b**), a colorless plate crystal of dimensions 0.82 x 0.10 x 0.07 mm<sup>3</sup> (**4a**), and a yellow plate of 0.27 x 0.23 x 0.07 mm<sup>3</sup> (**9**) were mounted with a MiteGen MicroMesh and a small amount of Cargille Immersion Oil (for salts **3a**, **3b**, and **4a**) or a Nylon loop with paratone oil (compound **9**). For all salts, data were collected on a Bruker three-circle platform diffractometer equipped with a SMART APEX II CCD detector. The crystals were irradiated using graphite monochromated MoK<sub>α</sub> radiation ( $\lambda = 0.71073$ ). An Oxford Cobra low temperature device was used to keep the crystals at a constant 124(2) K [**3a** and **3b**], and 150(2) K [**4a**] during data collection. For compound **9**, data were collected using a Bruker CCD (charge coupled device) based diffractometer equipped with an Oxford Cryostream low-temperature apparatus operating at 173 K. Data were measured using omega and phi scans of 1.0° per frame for 30 s. The total number of images was based on results from the program COSMO<sup>[1]</sup> where redundancy was expected to be 4.0 and completeness to 0.83 Å to 100%.

For all the salts, data collection was performed, and the unit cell was initially refined using APEX2 [v2009.3-0].<sup>[2]</sup> Data reduction was performed using SAINT [v7.60A]<sup>[3]</sup> and XPREP [v2008/2].<sup>[4]</sup> Corrections were applied for Lorentz, polarization, and absorption effects using SADABS [v2008/1].<sup>[5]</sup> The structure was solved and refined with the aid of the programs in the SHELXTL-plus [v2008/4] system of programs (**3a**, **3b**, and **4a**).<sup>[6]</sup> The full-matrix least-squares refinement on  $F^2$  included atomic coordinates and anisotropic thermal parameters for all non-H atoms. The H atoms were included using a riding model. Details of the data collection and refinement are given in Table S1.

For hydrazone **9**, cell parameters were retrieved using APEX II software<sup>[7]</sup> and refined using SAINT on all observed reflections. Data reduction was performed using the SAINT software<sup>[8]</sup> which corrects for Lp. Scaling and absorption corrections were applied using SADABS<sup>[9]</sup> multi-scan technique, supplied by George Sheldrick. The structures are solved by the direct method using the SHELXS-97 program and refined by least squares method on  $F^2$ , SHELXL-97<sup>[10a]</sup>, which are incorporated in OLEX2.<sup>[10b]</sup> The structure was solved in the space group  $P\bar{1}$  (# 2). All non-hydrogen atoms are refined anisotropically. Hydrogens were calculated by geometrical methods and refined as a riding model.

## 2. Crystal data and structural refinement:

**Table S1.** Crystallographic data for salts **3a**, **3b**, **4a**, and compound **9**

|                                            | <b>3a</b>                                                                    | <b>3b</b>                                                      | <b>4a</b>                                                                    | <b>9</b>                                                    |
|--------------------------------------------|------------------------------------------------------------------------------|----------------------------------------------------------------|------------------------------------------------------------------------------|-------------------------------------------------------------|
| Formula                                    | C <sub>3</sub> H <sub>5</sub> F <sub>3</sub> N <sub>4</sub> O <sub>7</sub> S | C <sub>2</sub> H <sub>5</sub> N <sub>4</sub> O <sub>8</sub> Cl | C <sub>5</sub> H <sub>9</sub> F <sub>3</sub> N <sub>6</sub> O <sub>7</sub> S | C <sub>5</sub> H <sub>9</sub> N <sub>5</sub> O <sub>4</sub> |
| MW                                         | 298.17                                                                       | 248.55                                                         | 354.24                                                                       | 203.17                                                      |
| CCDC                                       | 1008326                                                                      | 1008327                                                        | 1008328                                                                      | 1008325                                                     |
| T [K]                                      | 150 (2)                                                                      | 150 (2)                                                        | 150 (2)                                                                      | 174 (2)                                                     |
| Wavelength (Å)                             | 0.71073                                                                      | 0.71073                                                        | 0.71073                                                                      | 1.54178                                                     |
| Crystal system                             | Monoclinic                                                                   | Triclinic                                                      | Triclinic                                                                    | Triclinic                                                   |
| Space group                                | P 121/c1                                                                     | P-1                                                            | P-1                                                                          | P-1                                                         |
| <i>a</i> (Å)                               | 7.5409(4)                                                                    | 10.3533(11)                                                    | 6.2235(9)                                                                    | 6.68570(10)                                                 |
| <i>b</i> (Å)                               | 11.4812(6)                                                                   | 13.0615(14)                                                    | 10.5855(15)                                                                  | 6.89930(10)                                                 |
| <i>c</i> (Å)                               | 12.3048(6)                                                                   | 20.060(2)                                                      | 11.8361(17)                                                                  | 10.2681(2)                                                  |
| $\alpha$ (°)                               | 90                                                                           | 107.534(2)                                                     | 111.318(2)                                                                   | 76.7114(10)                                                 |
| $\beta$ (°)                                | 106.8020(10)                                                                 | 94.518(2)                                                      | 93.653(2)                                                                    | 79.0212(10)                                                 |
| $\gamma$ (°)                               | 90                                                                           | 95.584(2)                                                      | 102.778(2)                                                                   | 75.8661(10)                                                 |
| Volume (Å <sup>3</sup> )                   | 1019.85(9)                                                                   | 2557.6(5)                                                      | 699.44(17)                                                                   | 442.447(13)                                                 |
| Z                                          | 4                                                                            | 12                                                             | 2                                                                            | 2                                                           |
| Density (calculated) (g cm <sup>-3</sup> ) | 1.942                                                                        | 1.936                                                          | 1.682                                                                        | 1.525                                                       |
| Absorption coefficient                     | 0.404                                                                        | 0.489                                                          | 0.313                                                                        | 1.147                                                       |
| F(000)                                     | 600                                                                          | 1512                                                           | 360                                                                          | 212                                                         |
| Crystal size (mm <sup>3</sup> )            | 0.44 x 1.01 x 1.28                                                           | 0.37 x 0.14 x 0.11                                             | 0.60 x 0.27 x 0.25                                                           | 0.27 x 0.23 x 0.07                                          |
| Theta range for data collection (°)        | 2.48 to 30.52                                                                | 1.99 to 30.56                                                  | 1.87 to 26.47                                                                | 4.47 to 71.81                                               |
| Index ranges                               | -10 ≤ <i>h</i> ≤ 10, -16 ≤ <i>k</i> ≤ 16, -17 ≤ <i>l</i> ≤ 17                | -14 ≤ <i>h</i> ≤ 14, -18 ≤ <i>k</i> ≤ 18, -28 ≤ <i>l</i> ≤ 28  | -7 ≤ <i>h</i> ≤ 7, -13 ≤ <i>k</i> ≤ 12, -14 ≤ <i>l</i> ≤ 14                  | -8 ≤ <i>h</i> ≤ 8, -7 ≤ <i>k</i> ≤ 8, -12 ≤ <i>l</i> ≤ 12   |
| Reflections collected                      | 16143                                                                        | 41318                                                          | 6266                                                                         | 6216                                                        |
| Independent reflections                    | 3116 [R(int) = 0.0591]                                                       | 15578 [R(int) = 0.1209]                                        | 2825 [R <sub>int</sub> = 0.0169]                                             | 1680                                                        |

**Table S1** (continued). Crystallographic data for salts **3a**, **3b**, **4a**, and compound **9**

|                                                  | <b>3a</b>                                   | <b>3b</b>                                   | <b>4a</b>                                         | <b>9</b>                                          |
|--------------------------------------------------|---------------------------------------------|---------------------------------------------|---------------------------------------------------|---------------------------------------------------|
| Absorption correction                            | Multi-scan                                  | Multi-scan                                  | Semi-empirical from equivalents                   | Multi-scan                                        |
| Max. and Min. Transmission                       | 0.8423 and 0.6259                           |                                             | 0.9258 and 0.8344                                 | 0.7535 and 0.6458                                 |
| Refinement method                                | Full-matrix least-squares on F <sup>2</sup> | Full-matrix least-squares on F <sup>2</sup> | Full-matrix least-squares on F <sup>2</sup>       | Full-matrix least-squares on F <sup>2</sup>       |
| Data/restraints/parameters                       | 3116/0/163                                  | 15578/53/870                                | 2825/0/215                                        | 1680/0/141                                        |
| Goodness-of-fit on F2                            | 1.058                                       | 1.024                                       | 1.039                                             | 1.052                                             |
| Final R indices [I>2sigma(I)]                    | R1 = 0.0335, wR2 = 0.0877                   | R1 = 0.0481, wR2 = 0.1275                   | R <sub>1</sub> = 0.0338, wR <sub>2</sub> = 0.0875 | R <sub>1</sub> = 0.0323, wR <sub>2</sub> = 0.0854 |
| R indices (all data)                             | R1 = 0.0365, wR2 = 0.0896                   | R1 = 0.0592, wR2 = 0.1366                   | R <sub>1</sub> = 0.0388, wR <sub>2</sub> = 0.0910 | R <sub>1</sub> = 0.0401, wR <sub>2</sub> = 0.0900 |
| Largest diff. peak and hole (e Å <sup>-3</sup> ) | 0.499 and -0.463                            | 1.158 and -0.915                            | 0.587 and -0.375                                  | 0.24 and -0.17                                    |

### 3. Selected bond lengths and bond angles:

#### Salt **3a**

**Table S2.** Bond lengths (Å) of **3a**.

|       |            |         |            |
|-------|------------|---------|------------|
| C1-N4 | 1.3032(15) | N8-O10  | 1.2107(15) |
| C1-N3 | 1.3068(14) | S11-O15 | 1.4405(9)  |
| C1-C2 | 1.5179(15) | S11-O13 | 1.4436(9)  |
| C2-N5 | 1.5111(15) | S11-O14 | 1.4539(9)  |
| C2-N8 | 1.5164(14) | S11-C12 | 1.8358(12) |
| N5-O7 | 1.2119(14) | C12-F17 | 1.3108(15) |
| N5-O6 | 1.2158(14) | C12-F16 | 1.3167(16) |
| N8-O9 | 1.2082(16) | C12-F18 | 1.3186(14) |

**Table S3.** Bond angles (°) of **3a**

|             |            |             |            |
|-------------|------------|-------------|------------|
| N4-C1-N3    | 123.79(11) | O13-S11-C12 | 104.18(6)  |
| N4-C1-C2    | 120.39(10) | O14-S11-C12 | 104.77(6)  |
| N3-C1-C2    | 115.82(10) | F17-C12-F16 | 108.54(12) |
| N5-C2-N8    | 107.67(9)  | F17-C12-F18 | 107.62(12) |
| N5-C2-C1    | 112.17(9)  | F16-C12-F18 | 107.81(12) |
| N8-C2-C1    | 110.89(9)  | F17-C12-S11 | 111.21(9)  |
| O7-N5-O6    | 126.09(12) | F16-C12-S11 | 110.30(9)  |
| O7-N5-C2    | 117.87(10) | F18-C12-S11 | 111.23(9)  |
| O6-N5-C2    | 116.04(10) |             |            |
| O9-N8-O10   | 127.54(11) |             |            |
| O9-N8-C2    | 114.47(11) |             |            |
| O10-N8-C2   | 117.95(10) |             |            |
| O15-S11-O13 | 115.32(6)  |             |            |
| O15-S11-O14 | 114.15(6)  |             |            |
| O13-S11-O14 | 113.24(6)  |             |            |
| O15-S11-C12 | 103.47(6)  |             |            |

Salt **3b****Table S3.** Bond lengths (Å) of **3b**.

|          |            |             |            |
|----------|------------|-------------|------------|
| C1A-N4A  | 1.298(2)   | N5D-O6D     | 1.204(4)   |
| C1A-N3A  | 1.308(2)   | N5D'-O6D'   | 1.190(7)   |
| C1A-C2A  | 1.516(2)   | N5D'-O7D'   | 1.259(8)   |
| C2A-N5A  | 1.517(2)   | O6D'-O6D'#1 | 1.797(10)  |
| C2A-N8A  | 1.520(2)   | N8D-O9D     | 1.198(5)   |
| N5A-O7A  | 1.2151(17) | N8D-O10D    | 1.201(7)   |
| N5A-O6A  | 1.2161(17) | N8D'-O10'   | 1.203(5)   |
| N8A-O9A  | 1.189(2)   | N8D'-O9D'   | 1.214(4)   |
| N8A-O10A | 1.192(2)   | C1E-N3E     | 1.299(2)   |
| C1B-N3B  | 1.292(2)   | C1E-N4E     | 1.3049(19) |
| C1B-N4B  | 1.309(2)   | C1E-C2E     | 1.518(2)   |
| C1B-C2B  | 1.5179(19) | C2E-N5E     | 1.509(2)   |
| C2B-N8B  | 1.509(2)   | C2E-N8E     | 1.517(2)   |
| C2B-N5B  | 1.515(2)   | N5E-O7E     | 1.211(2)   |
| N5B-O7B  | 1.2054(19) | N5E-O6E     | 1.218(2)   |
| N5B-O6B  | 1.209(2)   | N8E-O9E     | 1.2156(18) |
| N8B-O9B  | 1.212(2)   | N8E-O10E    | 1.218(2)   |
| N8B-O10B | 1.231(3)   | C1F-N4F     | 1.298(2)   |
| C1C-N3C  | 1.298(2)   | C1F-N3F     | 1.3060(19) |
| C1C-N4C  | 1.3077(19) | C1F-C2F     | 1.5159(19) |
| C1C-C2C  | 1.514(2)   | C2F-N8F     | 1.506(2)   |
| C2C-N5C  | 1.511(2)   | C2F-N5F     | 1.5259(19) |
| C2C-N8C  | 1.523(2)   | N5F-O6F     | 1.2120(19) |
| N5C-O6C  | 1.2119(19) | N5F-O7F     | 1.216(2)   |
| N5C-O7C  | 1.222(2)   | N8F-O10F    | 1.215(2)   |
| N8C-O10C | 1.206(2)   | N8F-O9F     | 1.2163(19) |
| N8C-O9C  | 1.211(2)   | C11A-O4A    | 1.4329(14) |
| C1D-N4D  | 1.288(2)   | C11A-O2A    | 1.4341(15) |
| C1D-N3D  | 1.2983(19) | C11A-O1A    | 1.4344(14) |
| C1D-C2D  | 1.517(2)   | C11A-O3A    | 1.4363(13) |
| C2D-N8D  | 1.376(4)   | C11B-O3B    | 1.4283(13) |
| C2D-N5D  | 1.440(3)   | C11B-O2B    | 1.4368(14) |
| C2D-N8D' | 1.627(4)   | C11B-O1B    | 1.4434(14) |

**Table S3** (continued). Bond lengths (Å) of **3b**.

|          |          |          |            |
|----------|----------|----------|------------|
| C2D-N5D' | 1.648(5) | C11B-O4B | 1.4459(15) |
| N5D-O7D  | 1.137(7) | C11C-O4C | 1.4305(14) |

|          |            |          |            |
|----------|------------|----------|------------|
| Cl1C-O2C | 1.4341(14) | Cl1E-O1E | 1.4341(14) |
| Cl1C-O3C | 1.4392(13) | Cl1E-O4E | 1.4441(12) |
| Cl1C-O1C | 1.4414(14) | Cl1E-O2E | 1.4476(12) |
| Cl1D-O2D | 1.4232(13) | Cl1F-O2F | 1.4264(14) |
| Cl1D-O4D | 1.4386(13) | Cl1F-O3F | 1.4292(16) |
| Cl1D-O3D | 1.4403(12) | Cl1F-O4F | 1.4328(15) |
| Cl1D-O1D | 1.4493(14) | Cl1F-O1F | 1.4403(13) |
| Cl1E-O3E | 1.4299(13) |          |            |

**Table S4.** Bond angles (°) of **3b**.

|              |            |                  |            |
|--------------|------------|------------------|------------|
| N4A-C1A-N3A  | 124.15(14) | O9B-N8B-C2B      | 115.1(2)   |
| N4A-C1A-C2A  | 116.72(13) | O10B-N8B-C2B     | 116.92(16) |
| N3A-C1A-C2A  | 119.12(14) | N3C-C1C-N4C      | 124.07(14) |
| C1A-C2A-N5A  | 111.49(11) | N3C-C1C-C2C      | 116.37(13) |
| C1A-C2A-N8A  | 109.31(13) | N4C-C1C-C2C      | 119.56(14) |
| N5A-C2A-N8A  | 108.60(12) | N5C-C2C-C1C      | 113.52(13) |
| O7A-N5A-O6A  | 126.55(15) | N5C-C2C-N8C      | 107.10(13) |
| O7A-N5A-C2A  | 116.01(12) | C1C-C2C-N8C      | 109.34(12) |
| O6A-N5A-C2A  | 117.41(12) | O6C-N5C-O7C      | 126.85(18) |
| O9A-N8A-O10A | 125.52(18) | O6C-N5C-C2C      | 115.70(16) |
| O9A-N8A-C2A  | 115.13(16) | O7C-N5C-C2C      | 117.38(14) |
| O10A-N8A-C2A | 119.31(14) | O10C-N8C-O9C     | 127.06(18) |
| N3B-C1B-N4B  | 123.36(13) | O10C-N8C-C2C     | 118.46(16) |
| N3B-C1B-C2B  | 115.69(13) | O9C-N8C-C2C      | 114.48(17) |
| N4B-C1B-C2B  | 120.95(14) | N4D-C1D-N3D      | 124.17(16) |
| N8B-C2B-N5B  | 106.93(13) | N8D-C2D-N8D'     | 20.42(19)  |
| N8B-C2B-C1B  | 112.53(13) | N8D-C2D-N5D'     | 109.7(3)   |
| N5B-C2B-C1B  | 111.60(11) | N5D-C2D-N5D'     | 26.21(16)  |
| O7B-N5B-O6B  | 127.38(16) | N5D'-O6D'-O6D'#1 | 131.7(5)   |
| O7B-N5B-C2B  | 118.06(14) | O9D-N8D-O10D     | 128.5(5)   |
| O6B-N5B-C2B  | 114.51(14) | O9D-N8D-C2D      | 123.6(4)   |

**Table S4 (continued).** Bond angles (°) of **3b**.

|                |            |              |            |
|----------------|------------|--------------|------------|
| O9B-N8B-O10B   | 127.8(2)   | O3B-Cl1B-O2B | 110.21(8)  |
| O10'-N8D'-O9D' | 127.3(4)   | O10D-N8D-C2D | 107.8(4)   |
| O10'-N8D'-C2D  | 115.7(3)   | O2B-Cl1B-O1B | 111.28(9)  |
| O9D'-N8D'-C2D  | 117.0(3)   | O3B-Cl1B-O4B | 109.79(10) |
| N3E-C1E-N4E    | 124.18(14) | O2B-Cl1B-O4B | 108.94(9)  |
| N3E-C1E-C2E    | 115.42(13) | O1B-Cl1B-O4B | 107.69(9)  |

|              |            |              |            |
|--------------|------------|--------------|------------|
| N4E-C1E-C2E  | 120.39(14) | O4C-C11C-O2C | 110.60(10) |
| N5E-C2E-N8E  | 106.20(13) | O4C-C11C-O3C | 110.05(9)  |
| N5E-C2E-C1E  | 112.38(12) | O2C-C11C-O3C | 108.74(9)  |
| N8E-C2E-C1E  | 110.34(12) | O4C-C11C-O1C | 108.97(9)  |
| O7E-N5E-O6E  | 126.81(16) | O2C-C11C-O1C | 109.58(9)  |
| O7E-N5E-C2E  | 116.73(15) | O3C-C11C-O1C | 108.88(8)  |
| O6E-N5E-C2E  | 116.47(14) | O2D-C11D-O4D | 110.59(8)  |
| O9E-N8E-O10E | 127.28(16) | O2D-C11D-O3D | 110.96(9)  |
| O9E-N8E-C2E  | 115.88(14) | O4D-C11D-O3D | 108.94(8)  |
| O10E-N8E-C2E | 116.80(13) | O2D-C11D-O1D | 108.61(9)  |
| N4F-C1F-N3F  | 123.83(14) | O4D-C11D-O1D | 108.49(10) |
| N4F-C1F-C2F  | 121.11(13) | O3D-C11D-O1D | 109.21(8)  |
| N3F-C1F-C2F  | 115.06(14) | O3E-C11E-O1E | 110.07(9)  |
| N8F-C2F-C1F  | 113.70(12) | O3E-C11E-O4E | 109.92(9)  |
| N8F-C2F-N5F  | 106.75(11) | O1E-C11E-O4E | 109.32(8)  |
| C1F-C2F-N5F  | 111.19(12) | O3E-C11E-O2E | 109.62(8)  |
| O6F-N5F-O7F  | 127.87(15) | O1E-C11E-O2E | 109.86(9)  |
| O6F-N5F-C2F  | 117.38(14) | O4E-C11E-O2E | 108.02(8)  |
| O7F-N5F-C2F  | 114.59(13) | O2F-C11F-O3F | 108.84(10) |
| O10F-N8F-O9F | 126.11(16) | O2F-C11F-O4F | 109.94(9)  |
| O10F-N8F-C2F | 117.24(14) | O3F-C11F-O4F | 108.63(12) |
| O9F-N8F-C2F  | 116.62(14) | O2F-C11F-O1F | 111.06(9)  |
| O4A-C11A-O2A | 109.24(11) | O3F-C11F-O1F | 109.16(9)  |
| O4A-C11A-O1A | 108.74(9)  | O4F-C11F-O1F | 109.18(10) |
| O2A-C11A-O1A | 109.56(11) | O3B-C11B-O1B | 108.90(8)  |
| O4A-C11A-O3A | 110.41(9)  |              |            |
| O2A-C11A-O3A | 108.84(9)  |              |            |
| O1A-C11A-O3A | 110.03(8)  |              |            |



## Salt 4a

**Table S5.** Bond lengths (Å) of **4a**.

|              |            |              |            |
|--------------|------------|--------------|------------|
| C(1)-N(3)    | 1.507(2)   | C(1)-C(2)    | 1.514(2)   |
| C(1)-N(6)    | 1.516(2)   | C(1)-H(1)    | 1.0000     |
| C(2)-N(10)   | 1.292(2)   | C(2)-N(9)    | 1.325(2)   |
| N(3)-O(5)    | 1.209(2)   | N(3)-O(4)    | 1.213(2)   |
| N(6)-O(8)    | 1.202(2)   | N(6)-O(7)    | 1.221(2)   |
| N(9)-H(9A)   | 0.84(2)    | N(9)-H(9B)   | 0.83(2)    |
| N(10)-N(11)  | 1.4482(19) | N(11)-H(11C) | 0.88(2)    |
| N(11)-H(11B) | 0.84(2)    | N(11)-H(11A) | 0.88(2)    |
| C(12)-F(15)  | 1.318(2)   | C(12)-F(13)  | 1.325(2)   |
| C(12)-F(14)  | 1.326(2)   | C(12)-S(16)  | 1.8202(18) |
| S(16)-O(17)  | 1.4352(12) | S(16)-O(19)  | 1.4404(12) |
| S(16)-O(18)  | 1.4473(12) | C(21)-N(22)  | 1.130(2)   |
| C(21)-C(20)  | 1.450(3)   | C(20)-H(20A) | 0.9800     |
| C(20)-H(20B) | 0.9800     | C(20)-H(20C) | 0.9800     |

**Table S6.** Bond angles (°) of **4b**.

|                     |            |                     |            |
|---------------------|------------|---------------------|------------|
| N(3)-C(1)-C(2)      | 109.80(13) | N(3)-C(1)-N(6)      | 107.87(13) |
| C(2)-C(1)-N(6)      | 113.06(14) | N(3)-C(1)-H(1)      | 108.7      |
| C(2)-C(1)-H(1)      | 108.7      | N(6)-C(1)-H(1)      | 108.7      |
| N(10)-C(2)-N(9)     | 131.67(16) | N(10)-C(2)-C(1)     | 113.51(14) |
| N(9)-C(2)-C(1)      | 114.81(14) | O(5)-N(3)-O(4)      | 126.67(16) |
| O(5)-N(3)-C(1)      | 119.00(15) | O(4)-N(3)-C(1)      | 114.32(14) |
| O(8)-N(6)-O(7)      | 126.33(18) | O(8)-N(6)-C(1)      | 119.30(15) |
| O(7)-N(6)-C(1)      | 114.37(17) | C(2)-N(9)-H(9A)     | 117.4(14)  |
| C(2)-N(9)-H(9B)     | 120.5(14)  | H(9A)-N(9)-H(9B)    | 122(2)     |
| C(2)-N(10)-N(11)    | 112.75(13) | N(10)-N(11)-H(11C)  | 112.9(13)  |
| N(10)-N(11)-H(11B)  | 106.1(14)  | H(11C)-N(11)-H(11B) | 108.1(19)  |
| N(10)-N(11)-H(11A)  | 109.9(14)  | H(11C)-N(11)-H(11A) | 111.7(18)  |
| H(11B)-N(11)-H(11A) | 107.8(18)  | F(15)-C(12)-F(13)   | 108.67(17) |
| F(15)-C(12)-F(14)   | 108.49(16) | F(13)-C(12)-F(14)   | 107.91(16) |
| F(15)-C(12)-S(16)   | 110.85(13) | F(13)-C(12)-S(16)   | 110.85(13) |
| F(14)-C(12)-S(16)   | 109.99(13) | O(17)-S(16)-O(19)   | 115.82(8)  |
| O(17)-S(16)-O(18)   | 115.24(7)  | O(19)-S(16)-O(18)   | 112.79(8)  |
| O(17)-S(16)-C(12)   | 103.69(8)  | O(19)-S(16)-C(12)   | 104.22(8)  |
| O(18)-S(16)-C(12)   | 103.00(8)  | N(22)-C(21)-C(20)   | 179.4(2)   |
| C(21)-C(20)-H(20A)  | 109.5      | C(21)-C(20)-H(20B)  | 109.5      |
| H(20A)-C(20)-H(20B) | 109.5      | C(21)-C(20)-H(20C)  | 109.5      |
| H(20A)-C(20)-H(20C) | 109.5      | H(20B)-C(20)-H(20C) | 109.5      |

Compound **9**

**Table S7.** Bond lengths (Å) of **9**

|           |            |           |            |
|-----------|------------|-----------|------------|
| O(1)-N(4) | 1.2431(16) | N(3)-C(4) | 1.3157(18) |
| O(2)-N(4) | 1.2177(16) | N(4)-N(5) | 1.4295(18) |
| O(3)-N(5) | 1.2640(15) | N(5)-C(5) | 1.3892(18) |
| O(4)-N(5) | 1.2342(15) | C(1)-C(2) | 1.492(2)   |
| N(1)-N(2) | 1.3908(16) | C(2)-C(3) | 1.499(2)   |
| N(1)-C(2) | 1.283(2)   | C(4)-C(5) | 1.4462(18) |
| N(2)-C(4) | 1.3360(18) |           |            |

**Table S8.** Bond angles (°) of **9**.

|                |            |                |            |
|----------------|------------|----------------|------------|
| C(2)-N(1)-N(2) | 114.81(12) | N(1)-C(2)-C(3) | 116.29(14) |
| C(4)-N(2)-N(1) | 117.83(11) | C(1)-C(2)-C(3) | 119.04(14) |
| O(1)-N(4)-C(5) | 117.83(11) | N(2)-C(4)-C(5) | 119.75(11) |
| O(2)-N(4)-O(1) | 122.09(12) | N(3)-C(4)-N(2) | 117.86(12) |
| O(2)-N(4)-C(5) | 120.04(12) | N(3)-C(4)-C(5) | 122.38(12) |
| O(3)-N(5)-C(5) | 118.39(11) | N(4)-C(5)-C(4) | 120.52(11) |
| O(4)-N(5)-O(3) | 120.29(11) | N(5)-C(5)-N(4) | 116.58(11) |
| O(4)-N(5)-C(5) | 121.27(12) | N(5)-C(5)-C(4) | 122.86(12) |
| N(1)-C(2)-C(1) | 124.67(13) |                |            |

#### 4. Theoretical studies:

Energetic performances were calculated using Explo5 v6.01. The heats of formation for all the compounds were calculated using Gaussian 03 (Revision D. 01).<sup>[11]</sup> The geometric optimization of the structures was based on single-crystal structures, and frequency analyses were carried out using the B3LYP functional with 6-31+G\*\* basis set. Single-point energies were calculated at the MP2/6-311++G\*\* level.<sup>[12]</sup> Atomization energies for compounds **(3a)**, **(3b)**, **(4a)**, and **(4b)** were calculated using the G2 ab initio method.<sup>[13]</sup> All of the optimized structures were characterized to be true local energy minima on the potential energy surface without imaginary frequencies. The standard heats of formation of the salts were calculated based on the Born-Haber energy cycle (Scheme 1) and Equation (1).<sup>[1c,14]</sup>

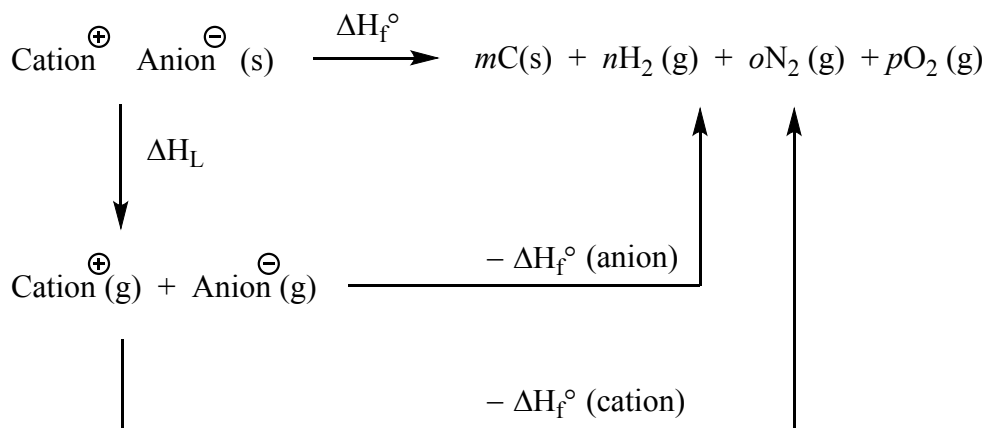

(\*"m, n, o, p" represent the number of moles of each product)

Figure 1. Born-Haber cycle for formation of energetic salts.

$$\Delta H_f^{\circ}(\text{salt}, 298\text{K}) = \Delta H_f^{\circ}(\text{cation}, 298\text{K}) + \Delta H_f^{\circ}(\text{anion}, 298\text{K}) - \Delta H_L \quad (1)$$

The lattice energy ( $\Delta H_L$ ) of the salts  $M_pX_q$  are calculated using Equation (2) suggested by Jenkins, et al.<sup>[15]</sup>:

$$\Delta H_L = U_{\text{POT}} + [p(n_M/2-2) + q(n_X/2-2)]RT \quad (2)$$

where  $n_M$  and  $n_x$  are dependent on the ions of  $M^{p+}$  and  $X^{q-}$  ( $q$  and  $p$  represent the charges on the cation and anion) and assigned values 3 for monoatomic ions, 5 for linear polyatomic ions, and 6 for nonlinear polyatomic ions. The lattice potential energy,  $U_{\text{POT}}$ , (reported as  $\text{kJ mol}^{-1}$ ) can be calculated from Equation (3):

$$U_{\text{POT}} = \gamma[\rho_m(M_m)^{1/3} + \delta] \quad (3)$$

where  $\rho_m$  is the density ( $\text{gcm}^{-3}$ ),  $M_m$  is the chemical formula mass of the ionic material (g), and the coefficients  $\gamma$  ( $\text{kJ mol}^{-1}\text{cm}$ ) and  $\delta$  ( $\text{kJ mol}^{-1}$ ) values are obtained from the literature.<sup>[16, 17]</sup>

The densities were calculated according to a reliable method by our group.<sup>[18]</sup> The volume of FOX-7 and HFOX were calculated by taking the reported volume of the parent compounds from their crystal structure reports and adding  $7\text{\AA}$  (volume for a hydrogen bonded to carbon) to the volume to incorporate the added proton for the cations according (FOX-7 cation vol. = 136.98, HFOX cation vol. = 155.75).<sup>[18]</sup> The volumes for the following anions were taken from the literature: (trinitromethanide, dinitroamide, nitrate, triflate, and perchlorate)<sup>[18]</sup>and NTO.

As mentioned in the manuscript, our initial investigation began with calculations of energetic salts containing FOX-7 and HFOX cations. Salts containing counter anions such as nitrate (**10a**, **11a**), trinitromethanide (**10b**, **11b**), dinitroamide (**10c**, **11c**), and 3-nitro-1,2,4-

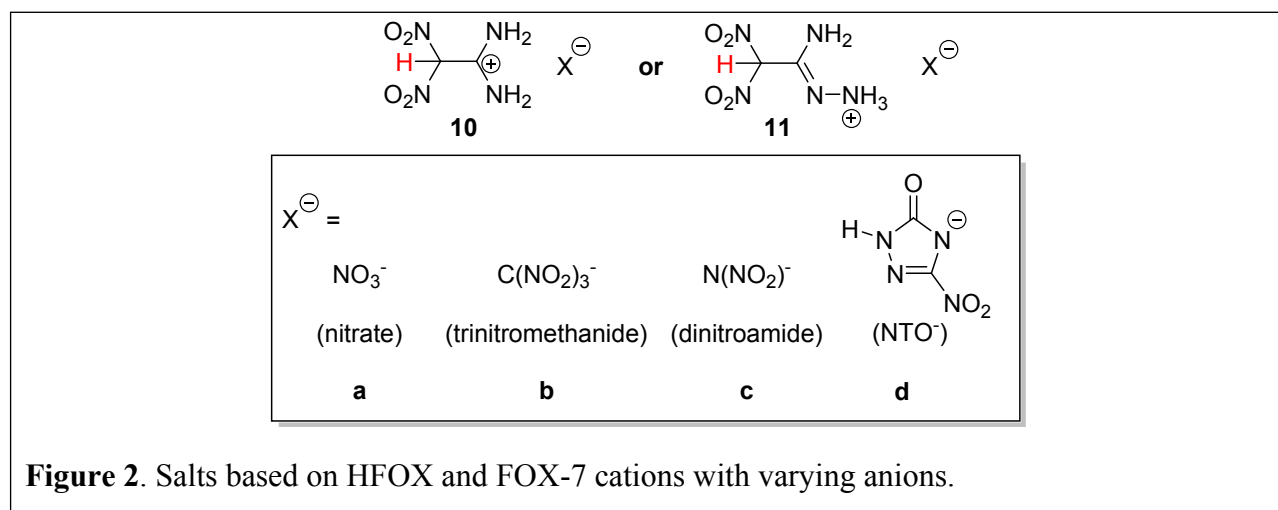

**Figure 2.** Salts based on HFOX and FOX-7 cations with varying anions.

triazol-5-one (NTO; [**10d**, **11d**]) were examined (Figure 2). The calculated energetic properties

were found to exceed that of TNT, FOX-7 and RDX, which supports the usefulness of FOX-7 and HFOX cations as building blocks for energetic salts (Table S9). Salt **11c** (8907 ms<sup>-1</sup>) has the highest detonation velocity among the salts, exceeding the values of TNT, FOX-7 and RDX. The remaining salts all exceed TNT while salts **10c-d** and **11b-d** are either comparable or slightly better than FOX-7. With the exception of **11a**, the detonation pressures of the salts approach those of FOX-7 and RDX.

**Table S9.** Calculated energetic properties of salts based on HFOX and FOX-7 cations with varying anions.

|                                    | Compounds    | $\rho^a$ | Vol. <sup>b</sup><br>(Å) | $\Delta H_{f(\text{cation})}^c$<br>(kJ/mol) | $\Delta H_{f(\text{anion})}^d$<br>(kJ/mol) | $\Delta H_f^e$<br>(kJ/mol) | P <sup>f</sup><br>(Gpa) | D <sup>g</sup><br>(ms <sup>-1</sup> ) | Isp <sup>h</sup><br>(s) |
|------------------------------------|--------------|----------|--------------------------|---------------------------------------------|--------------------------------------------|----------------------------|-------------------------|---------------------------------------|-------------------------|
| FOX-7<br>cation salts              | <b>10a</b>   | 1.753    | 199.98                   | 659.7                                       | -300.5                                     | -150.8                     | 31.8                    | 8670                                  | 262                     |
|                                    | <b>10b</b>   | 1.793    | 276.98                   | 659.7                                       | -287.0                                     | -96.0                      | 31.5                    | 8605                                  | 257                     |
|                                    | <b>10c</b>   | 1.811    | 233.98                   | 659.7                                       | -156.2                                     | 14.0                       | 32.9                    | 8793                                  | 259                     |
|                                    | <b>10d</b>   | 1.784    | 258.98                   | 659.7                                       | 63.9                                       | 246.8                      | 33.9                    | 8728                                  | 267                     |
| HFOX<br>cation salts               | <b>11a</b>   | 1.595    | 219.75                   | 799.5                                       | -300.5                                     | 1.50                       | 26.2                    | 8163                                  | 274                     |
|                                    | <b>11b</b>   | 1.758    | 296.75                   | 799.5                                       | -287.0                                     | 52.0                       | 32.4                    | 8706                                  | 266                     |
|                                    | <b>11c</b>   | 1.767    | 253.75                   | 799.5                                       | -156.2                                     | 164.0                      | 33.8                    | 8907                                  | 270                     |
|                                    | <b>11d</b>   | 1.746    | 278.75                   | 799.5                                       | 63.9                                       | 395.5                      | 33.5                    | 8750                                  | 274                     |
| Standard<br>energetic<br>compounds | <b>TNT</b>   | 1.65     | -                        | -                                           | -                                          | -59.3                      | 21.3                    | 7304                                  | 211                     |
|                                    | <b>FOX-7</b> | 1.88     | -                        | -                                           | -                                          | -134.1                     | 35.2                    | 8771                                  | 240                     |
|                                    | <b>RDX</b>   | 1.82     | -                        | -                                           | -                                          | 70.3                       | 35.8                    | 8864                                  | 267                     |

a) Calculated density [ref. 19]. b) Calculated volumes. c) Cation heat of formation. d) Anion heat of formation. e) Heat of formation. f) Detonation pressure. g) Detonation velocity. h) Specific impulse [calculated at an isobaric pressure of 70 bar and initial temperature of 3,300 K].

The specific impulse values of salts **10** and **11** are increased with the suggested counter anions with values that exceed TNT, FOX-7 and RDX (excluding **10b** and **10c**). By varying the counter anion, it can be seen that the properties of salts based on the FOX-7 and HFOX cations can be modified.

## 5. References

- [1] COSMO V1.61, *Software for the CCD Detector Systems for Determining Data Collection Parameters*. Bruker Analytical X-ray Systems, Madison, WI (2009).
- [2] Bruker (2010). Apex2 v2010.3-0. Bruker AXS Inc., Madison, Wisconsin, USA.
- [3] Bruker (2009). SAINT v7.68A. Bruker AXS Inc., Madison, Wisconsin, USA.
- [4] Bruker (2008). XPREP v2008/2. Bruker AXS Inc., Madison, Wisconsin, USA.
- [5] Bruker (2009). SADABS v2008/1. Bruker AXS Inc., Madison, Wisconsin, USA.
- [6] Bruker (2009). SHELXTL v2008/4. Bruker AXS Inc., Madison, Wisconsin, USA.
- [7] APEX2 V2010.11-3. *Software for the CCD Detector System*; Bruker Analytical X-ray Systems, Madison, WI (2010).
- [8] SAINT V 7.68A *Software for the Integration of CCD Detector System* Bruker Analytical X-ray Systems, Madison, WI (2010).
- [9] SADABS V2008/2 Program for absorption corrections using Bruker-AXS CCD based on the method of Robert Blessing; Blessing, R.H. *Acta Cryst.* A51, 1995, 33-38.
- [10] a) Sheldrick, G.M. "A short history of SHELX". *Acta Cryst.* A64, 2008, 112-122. b) O. V. Dolomanov, L. J. Bourhis, R. J. Gildea, J. A. K. Howard and H. Puschmann, OLEX2: a complete structure solution, refinement and analysis program. *J. Appl. Cryst.* (2009). 42, 339-341
- [11] M. J. Frisch, G. W. Trucks, H. B. Schlegel, G. E. Scuseria, M. A. Robb, J. R. Cheeseman, J. A. Montgomery, T. V. Jr., K. N. Kudin, J. C. Burant, J. M. Millam, S. S. Iyengar, J. Tomasi, V. Barone, B. Mennucci, M. Cossi, G. Scalmani, N. Rega, G. A. Petersson, H. Nakatsuji, M. Hada, M. Ehara, K. Toyota, R. Fukuda, J. Hasegawa, M. Ishida, T. Nakajima, Y. Honda, O. Kitao, H. Nakai, M. Klene, X. Li, J. E. Knox, H. P. Hratchian, J. B. Cross, V. Bakken, C. Adamo, J. Jaramillo, R. Gomperts, R. E. Stratmann, O. Yazyev, A. J. Austin, R. Cammi, C. Pomelli, J. W. Ochterski, P. Y. Ayala, K. Morokuma, G. A. Voth, P. Salvador, J. J. Dannenberg, V. G. Zakrzewski, S. Dapprich, A. D. Daniels, M. C. Strain, O. Farkas, D. K. Malick, A. D. Rabuck, K. Raghavachari, J. B. Foresman, J. V. Ortiz, Q. Cui, A. G. Baboul, S. Clifford, J. Cioslowski, B. B. Stefanov, A. L. G. Liu, P. Piskorz, I. Komaromi, R. L. Martin, D. J. Fox, T. Keith, M. A. Al-Laham, C. Peng, A. Nanayakkara, M. Challacombe, P. M. W. Gill, B. Johnson, W. Chen, M. Wong, C. Gonzalez, J. A. Pople, *Gaussian 03, Revision D. 01*, Gaussian, Inc., Wallingford, CT, 2004.
- [12] R. G. Parr, W. Wang, *Density Functional Theory of Atoms and Molecules*, Oxford University Press, New York 1989.
- [13] Suleimenov, O. M.; Ha, T. K. *Chem. Phys. Lett.* 1998, 290, 451-457.
- [14] Gao, H.; Ye, C.; Piekarski, C. M.; Shreeve, J. M. *J. Phys. Chem. C*, 2007, 111(28), 10718-10731.
- [15] H. D. B. Jenkins, D. Tudeal, L. Glasser, *Inorg. Chem.* 2002, 41, 2364 - 2367.
- [16] M. W. Schmidt, M. S. Gordon, J. A. Boatz, *J. Phys. Chem. A* 2005, 109, 7285-7295.
- [17] W. J. Middleton, E. L. Little, D. D. Coffman, V. A. Engelhardt, *J. Am. Chem. Soc.* 1958, 80, 2795 - 2806.

- [18] a) Ye, C.; Shreeve, J. M. *J. Phys. Chem. A* **2007**, *111*, 1456–1461. b) Gao, H.; Ye, C.; Piekarski, C. M.; Shreeve, J. M. *J. Phys. Chem. C*, **2007**, *111*, 10718 – 10731.
- [19] Xue, H.; Gao, H. Twamley, B.; Shreeve, J. M. *Chem. Mater.* **2007**, 1731 – 1739.
